# Supplementary material
Source: publisher site journal article supplement (https://www.dovepress.com/article/308587)
Supplement: Supplementary file 1 [file get_supplementary_file.php]

**Supplementary Table 1.** Patient demographics of validation cohort.

| **Characteristics** | **Total**  **Patients** | **No Late**  **Recurrence** | **Late**  **Recurrence** | ***p-*value** |
| --- | --- | --- | --- | --- |
| ***n*** | 97 | 77 (79.38%) | 20 (20.62%) |  |
| **aMAP Score** |  |  |  | **<0.001** |
| ≤64.2 | 70 | 65 (84.41%) | 5 (25.00%) |  |
| 64.3-68.6 | 17 | 10 (12.99%) | 7 (35.00%) |  |
| ≥68.7 | 10 | 2 (2.60%) | 8 (40.00%) |  |
| **Age (years)** |  |  |  | **0.900** |
| ≤60 | 57 | 45 (58.44%) | 12 (60.00%) |  |
| >60 | 40 | 32 (41.56%) | 8 (40.00%) |  |
| **Gender** |  |  |  | **0.120** |
| Female | 88 | 15 (19.48%) | 1 (5.00%) |  |
| Male | 310 | 62 (80.52%) | 19 (95.00%) |
| **Max Size (cm)** |  |  |  | **0.086** |
| ≤3.0 | 73 | 55 (71.43%) | 18 (90.00%) |  |
| >3.0 | 24 | 22 (28.57%) | 2 (10.00%) |  |
| **Number** |  |  |  | **0.004** |
| Solitary | 76 | 65 (84.42%) | 11 (55.00%) |  |
| Multiple | 21 | 12 (15.58%) | 9 (45.00%) |
| **Ablation sessions** |  |  |  | **0.814** |
| 1 | 84 | 67 (87.01%) | 17 (85.00%) |  |
| 2 | 13 | 10 (12.99%) | 3 (15.00%) |  |
| **Location** |  |  |  | **0.218** |
| favorable | 89 | 72 (93.51%) | 17 (85.00%) |  |
| unfavorable | 8 | 5 (6.49%) | 3 (15.00%) |  |
| **Etiology** |  |  |  | **0.749** |
| HBV | 85 | 68 (88.31%) | 17 (85.00%) |  |
| HCV | 11 | 8 (10.39%) | 3 (15.00%) |
| Alcoholic | 1 | 1 (1.30%) | 0 (0.00%) |  |
| **Antiviral Therapy** |  |  |  | **0.413** |
| No | 36 | 27 (35.06%) | 9 (45.00%) |  |
| Yes | 61 | 50 (64.94%) | 11 (55.00%) |  |
| **Cirrhosis** |  |  |  | **0.316** |
| No | 11 | 10 (12.99%) | 1 (5.00%) |  |
| Yes | 86 | 67 (87.01%) | 19 (95.00%) |  |
| **Child-Pugh class** |  |  |  | **0.370** |
| A | 94 | 74 (96.10%) | 20 (100.00%) |  |
| B | 3 | 3 (3.90%) | 0 (0.00%) |
| **ALBI grade** |  |  |  | **0.460** |
| 1 | 56 | 43 (55.84%) | 13 (65.00%) |  |
| 2 | 41 | 34 (44.16%) | 7 (35.00%) |  |
| **AFP (ng/mL)** |  |  |  | **0.553** |
| ≤400 | 89 | 70 (90.91%) | 19 (95.00%) |  |
| >400 | 8 | 7 (9.09%) | 1 (5.00%) |  |
| **ALB (g/L)** |  |  |  | **0.089** |
| ≤35 | 10 | 10 (12.99%) | 0 (0.00%) |  |
| >35 | 87 | 67 (87.01%) | 20 (100.00%) |
| **AST (U/L)** |  |  |  | **0.744** |
| ≤40 | 80 | 64 (83.12%) | 16 (80.00%) |  |
| >40 | 17 | 13 (16.88%) | 4 (20.00%) |
| **ALT (U/L)** |  |  |  | **0.841** |
| ≤40 | 21 | 17 (22.08%) | 4 (20.00%) |  |
| >40 | 76 | 60 (77.92%) | 16 (80.00%) |
| **PLT (109/L)** |  |  |  | **0.063** |
| ≤100 | 36 | 25 (32.47%) | 11 (55.00%) |  |
| >100 | 61 | 52 (67.53%) | 9 (45.00%) |  |
| **TBIL (μmol/L)** |  |  |  | **0.624** |
| ≤17.1 | 58 | 47 (61.04%) | 11 (55.00%) |  |
| >17.1 | 39 | 30 (38.96%) | 9 (45.00%) |  |
| **γ-GT (U/L)** |  |  |  | **0.603** |
| ≤60 | 63 | 51 (66.23%) | 12 (60.00%) |  |
| >60 | 34 | 26 (33.77%) | 8 (40.00%) |

HBV, hepatitis B virus; HCV, hepatitis C virus; ALBI, albumin-bilirubin; AFP, alpha-fetoprotein; ALB, albumin; AST, aspartic transaminase; ALT, alanine aminotransferase; TBIL, total bilirubin; PLT, platelet; γ-GT, γ-glutamyl transpeptidase.
